## CORRECTION

# Correction: Assessment of the efficacy of field and laboratory methods for the detection of *Tropilaelaps* spp.

The *PLOS ONE* Staff

## Notice of Republication

An incorrect, earlier version of this article was published in error. The publisher apologises for the error. This article was republished on December 18, 2024, to correct for this error. Please download the article again to view the correct version. The originally published, uncorrected article and the republished, corrected article are provided here for reference. Reference

## Supporting information

### S1 File. Originally published, uncorrected article.

(PDF)

### S2 File. Republished, corrected article.

(PDF)

## References

1. Gill MC, Chuttong B, Davies P, Etheridge D, Panyaraksa L, Tomkies V, et al. (2024) Assessment of the efficacy of field and laboratory methods for the detection of *Tropilaelaps* spp. *PLoS ONE* 19(9): e0301880. <https://doi.org/10.1371/journal.pone.0301880>

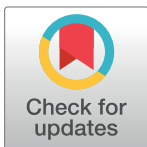

## OPEN ACCESS

**Citation:** The *PLOS ONE* Staff (2024) Correction: Assessment of the efficacy of field and laboratory methods for the detection of *Tropilaelaps* spp.. *PLoS ONE* 19(12): e0316864. <https://doi.org/10.1371/journal.pone.0316864>

**Published:** December 30, 2024

**Copyright:** © 2024 The PLOS ONE Staff. This is an open access article distributed under the terms of the [Creative Commons Attribution License](https://creativecommons.org/licenses/by/4.0/), which permits unrestricted use, distribution, and reproduction in any medium, provided the original author and source are credited.
